# Supplementary material
Source: PubMed Central journal article supplement (PMC3535964)
Supplement: AAC.01463-12_zac999101526so1.pdf [file AAC.01463-12_zac999101526so1.pdf]

## Rings

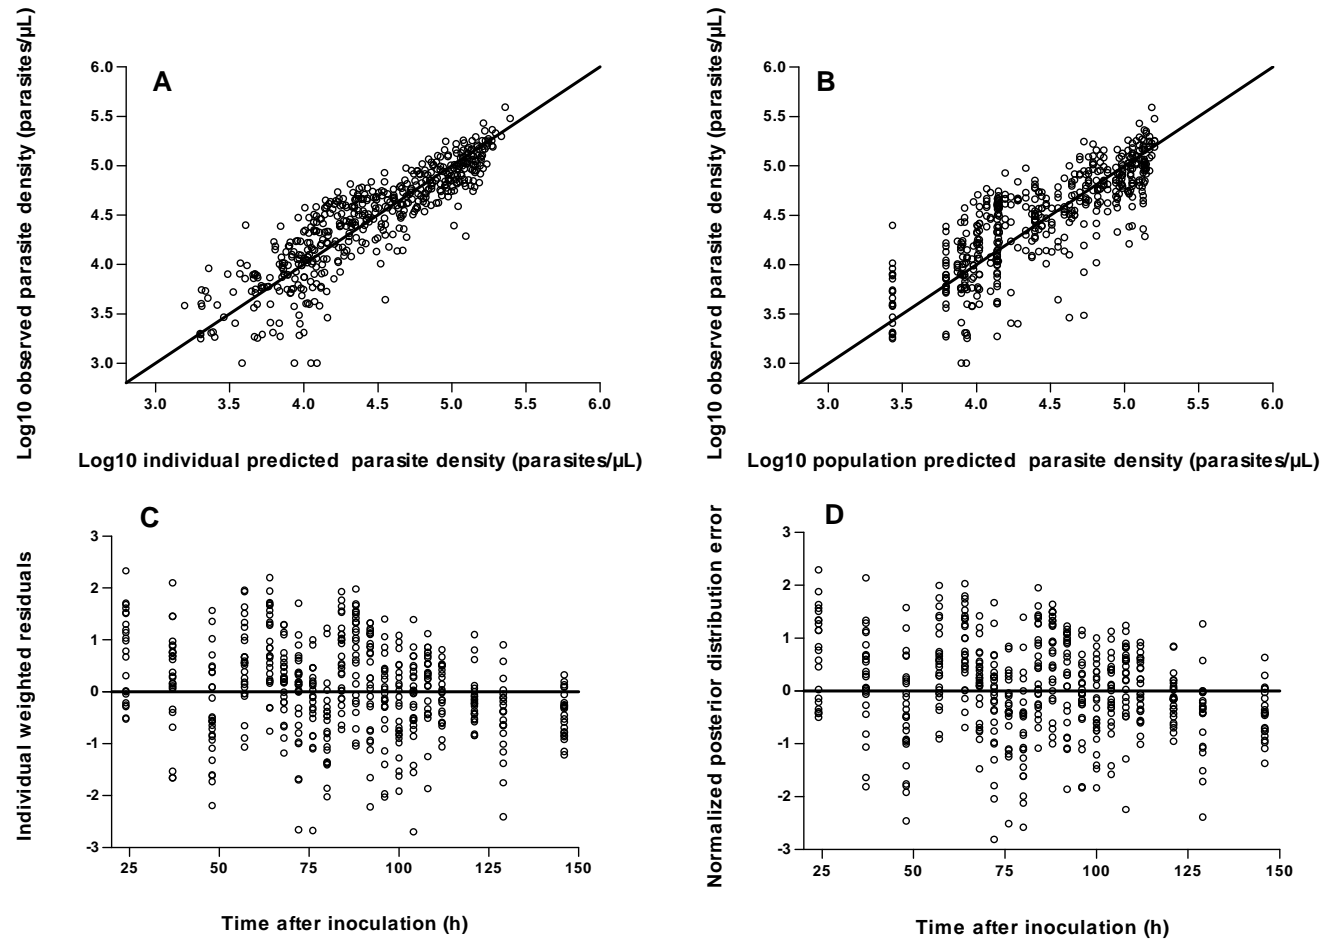

**Fig. S1** – Goodness-of-fit plots for rings in the final model. The logarithmically transformed (A) individual- and (B) population-predicted parasite densities; the time after inoculation *vs.* (C) individual weighted residuals and (D) normalized posterior distribution error.

## Early Trophozoites

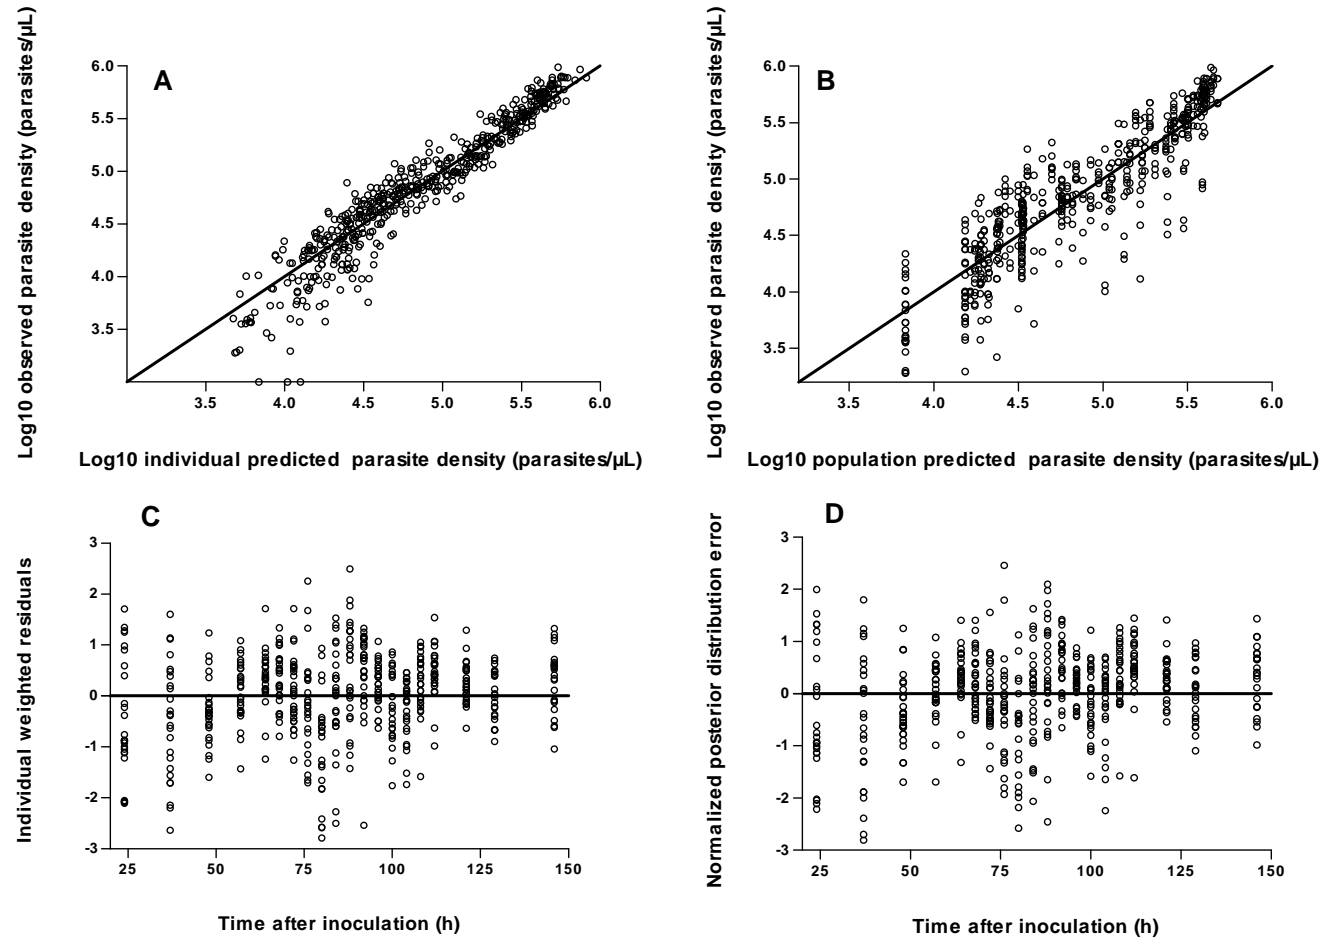

**Fig. S2** – Goodness-of-fit plots for early trophozoites in the final model. The logarithmically transformed (A) individual- and (B) population-predicted parasite densities; the time after inoculation vs. (C) individual weighted residuals and (D) normalized posterior distribution error.

## Late Trophozoites

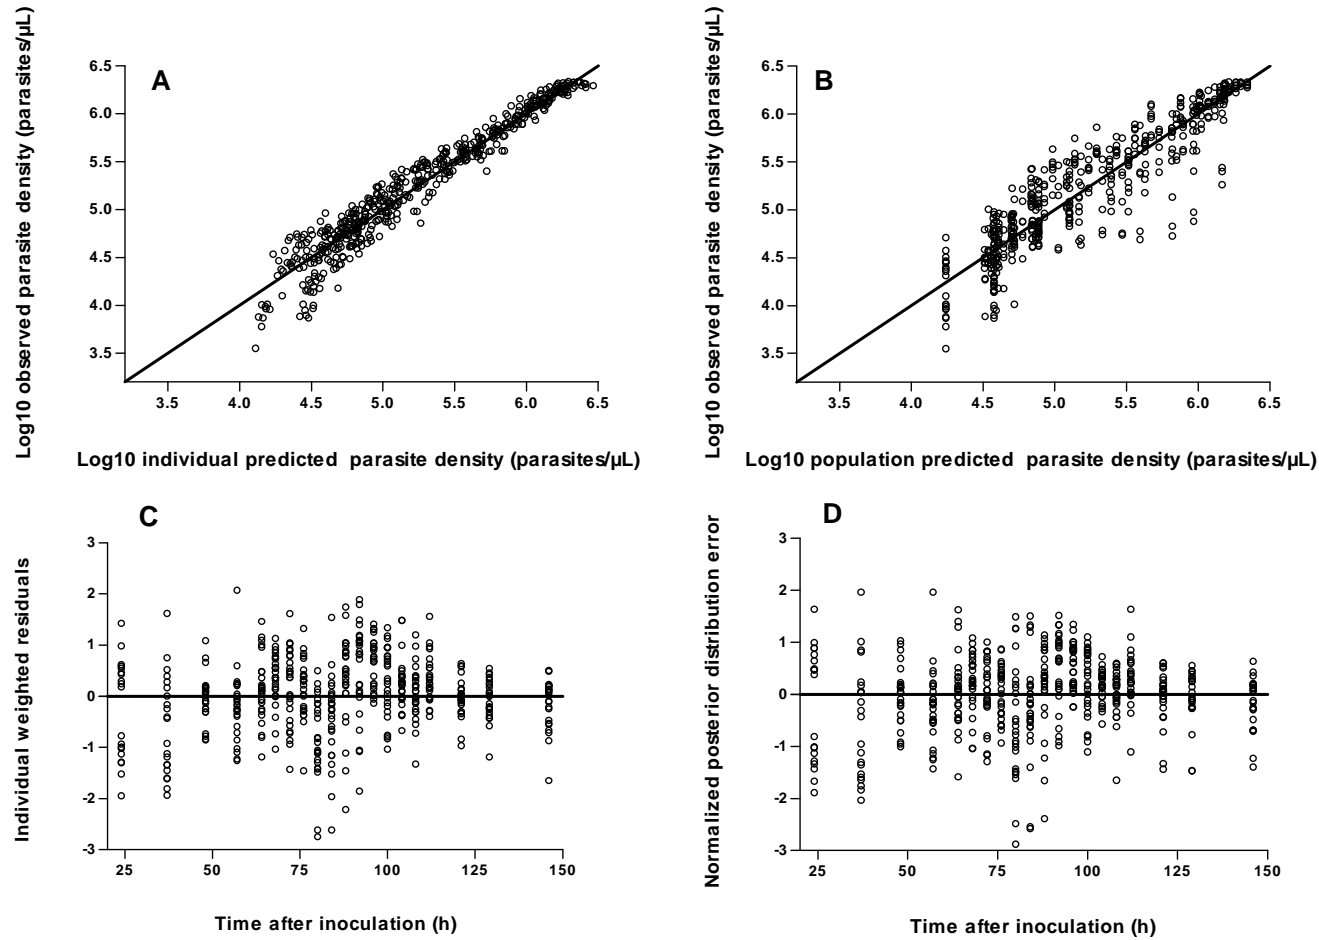

**Fig. S3** – Goodness-of-fit plots for late trophozoites in the final model. The logarithmically transformed (A) individual- and (B) population-predicted parasite densities; the time after inoculation vs. (C) individual weighted residuals and (D) normalized posterior distribution error.

## Schizonts

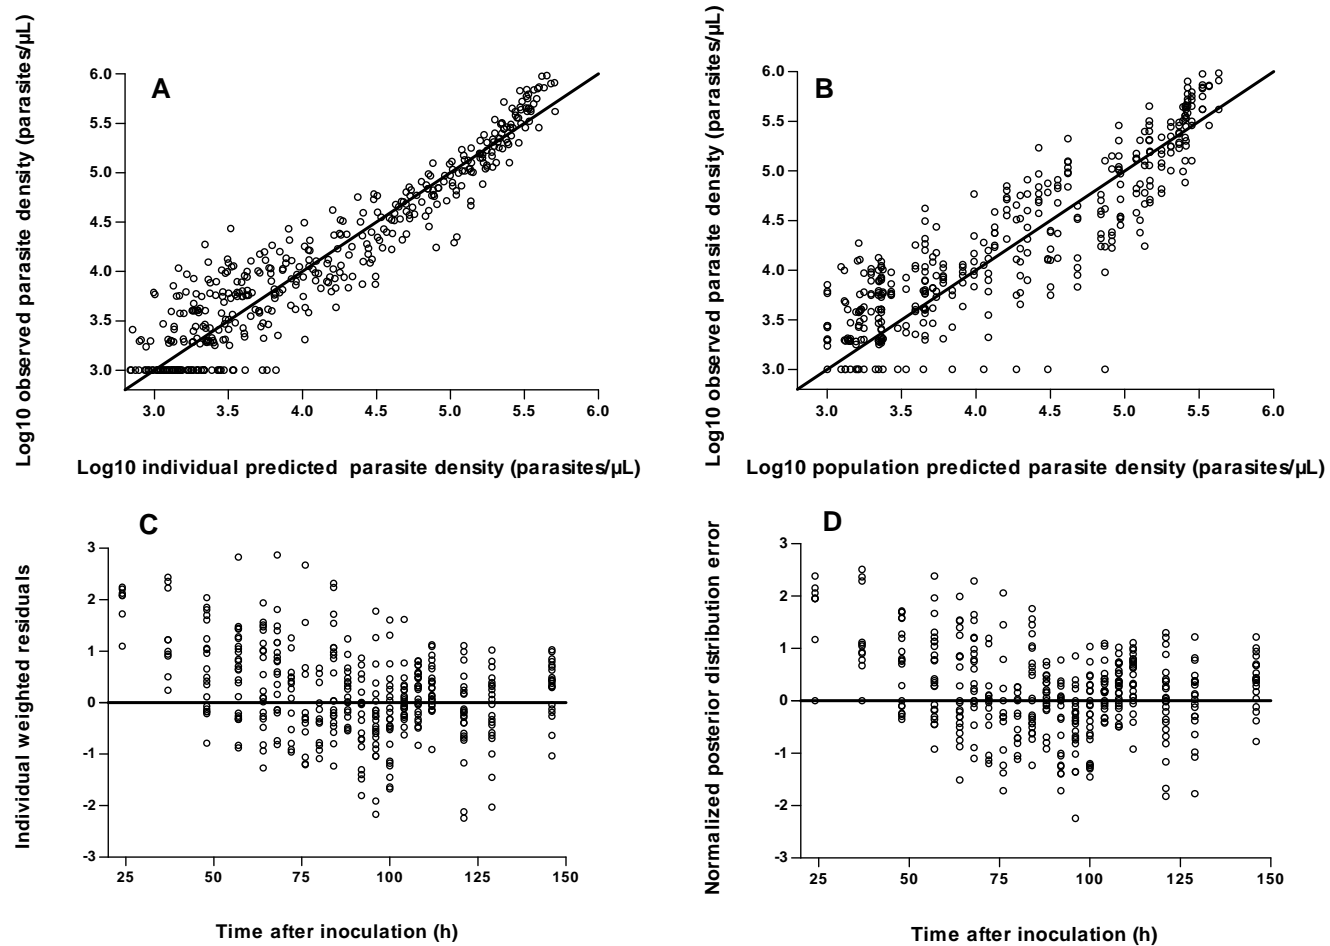

**Fig. S4** – Goodness-of-fit plots for schizonts in the final model. The logarithmically transformed (A) individual- and (B) population-predicted parasite densities; the time after inoculation vs. (C) individual weighted residuals and (D) normalized posterior distribution error.
